# Supplementary material
Source: MDPI journal article supplement (https://www.mdpi.com/2673-396X/1/2/10)
Supplement: s1 [file s1]

# Supplementary Materials

## **Malignancy Analyses of Thyroid Nodules in patients subjected to Surgery with Cytological- and Ultrasound-based Risk Stratification Systems**

Stefania Giuliano <sup>1</sup>, Maria Mirabelli <sup>2</sup>, Eusebio Chiefari <sup>2</sup>, Margherita Vergine <sup>1</sup>, Rita Gervasi <sup>3</sup>, Francesco S. Brunetti <sup>2</sup>, Nadia Innaro <sup>3</sup>, Giuseppe Donato <sup>2</sup>, Antonio Aversa <sup>1,4</sup>, and Antonio Brunetti <sup>1,2,\*</sup>

<sup>1</sup> Operative Unit of Endocrinology, Azienda Ospedaliera “Mater-Domini”, 88100 Catanzaro, Italy

<sup>2</sup> Department of Health Sciences, University of “Magna Græcia” Catanzaro, 88100 Catanzaro, Italy

<sup>3</sup> Unit of Endocrine Surgery, Azienda Ospedaliera “Mater-Domini”, 88100 Catanzaro, Italy

<sup>4</sup> Department of Experimental and Clinical Medicine, University of “Magna Græcia” Catanzaro, 88100 Catanzaro, Italy

\* Correspondence to [brunetti@unicz.it](mailto:brunetti@unicz.it)

**Table S1.** Final histology of thyroid nodules classified as highly suspicious for malignancy, according to US risk stratification systems.

| Final histology                    | High (AACE/ACE/AME) | High suspicion (ATA) | TR5 (ACR-TIRADS) |
|------------------------------------|---------------------|----------------------|------------------|
|                                    | N (%)               | N (%)                | N (%)            |
| <b>Malignant lesions (overall)</b> | 102                 | 61                   | 47               |
| PTC                                | 89 (87.3)           | 55 (90.2)            | 42 (89.4)        |
| FTC                                | 6 (5.9)             | 2 (3.3)              | 1 (2.1)          |
| MTC                                | 5 (4.9)             | 3 (4.9)              | 3 (6.4)          |
| HCC                                | 1 (1.0)             | 0 (0.0)              | 0 (0.0)          |
| ATC                                | 1 (1.0)             | 1 (1.6)              | 1 (2.1)          |
| Lymphoma                           | 1 (1.0)             | 0 (0)                | 0 (0)            |
| <b>Benign lesions (overall)</b>    | 77                  | 33                   | 17               |
| Nodular goiter                     | 44 (57.1)           | 20 (60.6)            | 10 (58.8)        |
| Nodular adenomatous hyperplasia    | 16 (20.8)           | 6 (18.2)             | 1 (5.9)          |
| Follicular adenoma                 | 11 (14.3)           | 5 (15.2)             | 5 (29.4)         |
| Chronic lymphocytic thyroiditis    | 5 (6.5)             | 2 (6.1)              | 1 (5.9)          |

US: Ultrasound; AACE/ACE/AME: American Association of Clinical Endocrinologists, American College of Endocrinology and Associazione Medici Endocrinologi; ATA: American Thyroid Association; ACR-TIRADS: American College of Radiology Thyroid Imaging Reporting and Data System; PTC, papillary thyroid carcinoma; FTC, follicular thyroid carcinoma; MTC, medullary thyroid carcinoma; HCC, Hürthle cell carcinoma; ATC, anaplastic thyroid carcinoma.

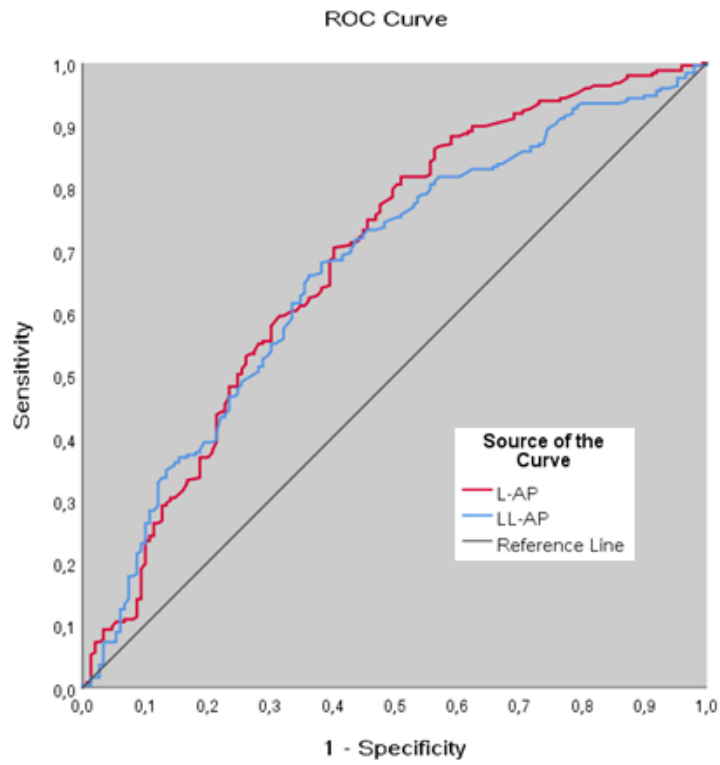

| Test Result Variable(s) | Area | Std. Error <sup>a</sup> | Asymptotic Sig. <sup>b</sup> | Asymptotic 95% Confidence Interval |             |
|-------------------------|------|-------------------------|------------------------------|------------------------------------|-------------|
|                         |      |                         |                              | Lower Bound                        | Upper Bound |
| L-AP                    | ,687 | ,028                    | ,000                         | ,631                               | ,742        |
| LL-AP                   | ,668 | ,028                    | ,000                         | ,612                               | ,723        |

Figure S1. ROC analyses illustrating the diagnostic abilities of the measured differences between L, LL and AP diameters in discriminating benign thyroid lesions.

ROC, receiver operating curve; L, longitudinal; LL, transverse; AP, anteroposterior.

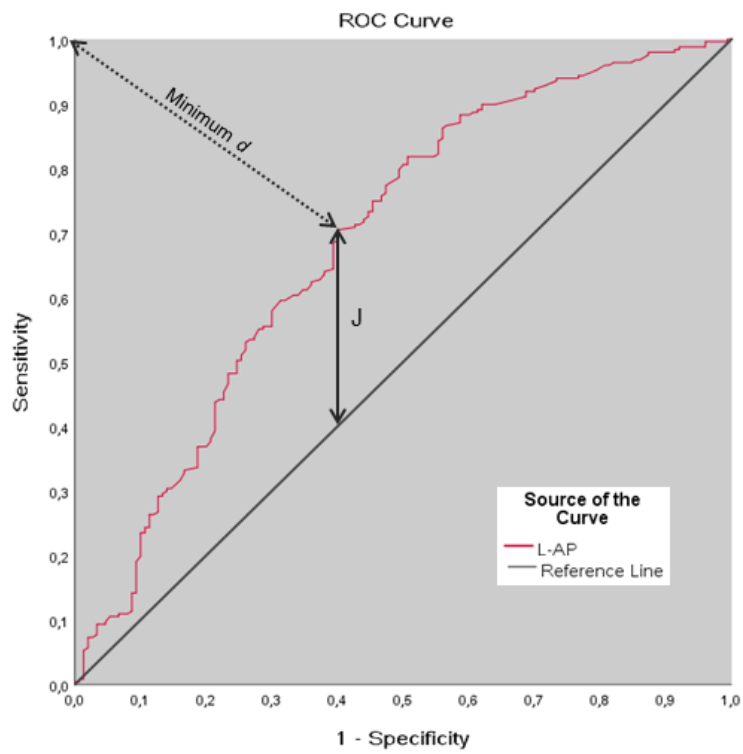

Figure S2. Graphical representation of maximum Youden's index ( $J$ ) and minimum  $d$  denoting the critical cut-off point in discriminating benign thyroid lesions for the measured difference between L and AP diameters.
